# Supplementary material for: Influencing Factors to mHealth Uptake With Indigenous Populations: Qualitative Systematic Review
Source: PubMed Central journal article supplement (PMC10337452; doi:10.2196/45162), 2023-06-23
Supplement: mhealth_v11i1e45162_app2.pdf [file mhealth_v11i1e45162_app2.pdf]

| Items assessed                                                                          | Number of studies: 17 |    |            |
|-----------------------------------------------------------------------------------------|-----------------------|----|------------|
|                                                                                         | Yes                   | No | Can't tell |
| 1. Was there a clear statement of the aims of the research?                             | 15                    | 2  | 0          |
| 2. Is a qualitative methodology appropriate?                                            | 16                    | 0  | 1          |
| 3. Was the research design appropriate to address the aims of the research?             | 15                    | 0  | 2          |
| 4. Was the recruitment strategy appropriate to the aims of the research?                | 16                    | 0  | 1          |
| 5. Was the data collected in a way that addressed the research issue?                   | 13                    | 1  | 3          |
| 6. Has the relationship between researcher and participants been adequately considered? | 8                     | 6  | 3          |
| 7. Have ethical issues been taken into consideration?                                   | 14                    | 3  | 0          |
| 8. Was the data analysis sufficiently rigorous?                                         | 11                    | 3  | 3          |
| 9. Is there a clear statement of findings?                                              | 17                    | 0  | 0          |
| 10. How valuable is the research?                                                       | 17                    | 0  | 0          |
| 11. Is there a statement locating the researcher culturally or theoretically?           | 6                     | 7  | 4          |
